# Supplementary material
Source: PubMed Central journal article supplement (PMC4309289)
Supplement: NIHMS449739-supplement-Supplementary_Data.pdf [file NIHMS449739-supplement-Supplementary_Data.pdf]

## Supplementary Data

---

# Deletion of the Cathepsin B Gene Improves Memory Deficits in a Transgenic Alzheimer's Disease Mouse Model Expressing A $\beta$ PP Containing the Wild-Type $\beta$ -Secretase Site Sequence

Mark S. Kindy<sup>a,b,c,\*</sup>, Jin Yu<sup>a</sup>, Hong Zhu<sup>a</sup>, Salim S. El-Amouri<sup>d</sup>, Vivian Hook<sup>e</sup> and Gregory R. Hook<sup>f</sup>

<sup>a</sup>*Department of Neurosciences, Medical University of South Carolina, Charleston, SC, USA*

<sup>b</sup>*Ralph H. Johnson VA Medical Center, Charleston, SC, USA*

<sup>c</sup>*Applied Neurotechnology, Inc., Charleston, SC, USA*

<sup>d</sup>*Division of Experimental Hematology, Cincinnati Children's Hospital Medical Center, University of Cincinnati, Cincinnati, OH, USA*

<sup>e</sup>*Skaggs School of Pharmacy and Pharmaceutical Sciences and Departments of Neurosciences, Pharmacology and Medicine, University of California, San Diego, La Jolla, CA, USA*

<sup>f</sup>*American Life Science Pharmaceuticals, San Diego, CA, USA*

Accepted 10 January 2012

---

\*Correspondence to: Mark S. Kindy, Ph.D., Department of Neurosciences, 114 Doughty Street, Room 503, Medical University of South Carolina, Charleston, SC 29425, USA. Tel.: 843 792 0808; Fax: 843 876 1905; E-mail: kindyms@musc.edu.

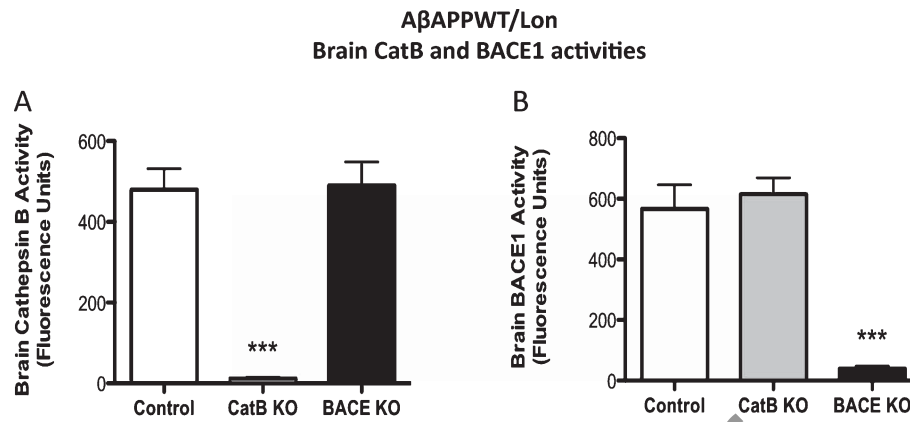

Supplementary Figure 1. A $\beta$ APPWT/Lon mice with knockout of the CatB or BACE1 genes lack the respective protease activities. CatB and BACE1 protease activities were measured in brain extracts of control A $\beta$ APPWT/Lon mice, A $\beta$ APPWT/Lon  $\times$  CatB knockout (CatB KO), and A $\beta$ APPWT/Lon  $\times$  BACE1 KO (BACE1 KO), as described in the methods. CatB protease activity (A) and BACE1 activity (B) are expressed as the  $x \pm$  s.e.m. ( $n=6$  per group, \*\*\*  $p < 0.05$ ). Knockout of each these protease genes resulted in elimination of the respective protease activity.

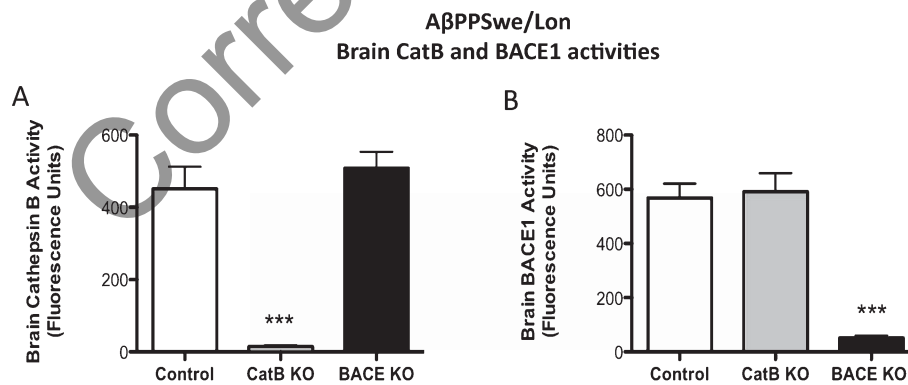

Supplementary Figure 2. A $\beta$ PPSwe/Lon mice with knockout of the CatB or BACE1 genes lack the respective protease activities. CatB and BACE1 protease activities were measured in brain extracts of control A $\beta$ PPSwe/Lon mice, A $\beta$ PPSwe/Lon  $\times$  CatB knockout (CatB KO), and A $\beta$ PPSwe/Lon  $\times$  BACE1 KO (BACE1 KO), as described in the methods. CatB protease activity (A) and BACE1 activity (B) are expressed as the mean,  $x \pm$  s.e.m. ( $n=6$  per group, \*\*\*  $p < 0.05$ ). Knockout of each these protease genes resulted in elimination of the respective protease activity.

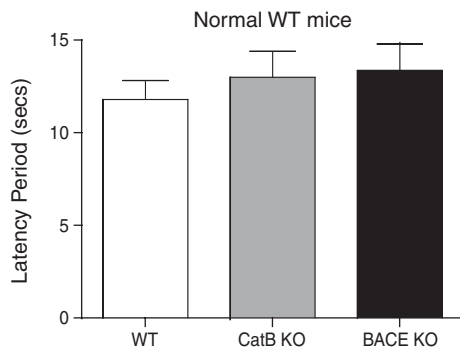

Supplementary Figure 3. Normal memory of non-transgenic mice is not affected by knockout of CatB or BACE1 genes. Normal non-transgenic mice with knockout of CatB or BACE1 (age and strain matched to the transgenic mice of this study) were assessed for memory function by the Morris water maze test, achieved by measuring the latency period for mice to swim to a submerged hidden platform in a pool of water, after training, as described in the methods. The latency period measurements (secs) are expressed as the mean  $\pm$  s.e.m. ( $n = 10$ ).

Corrected proof
